# Supplementary material for: Students’ Knowledge about Cervical Cancer Prevention in Poland
Source: MDPI journal article supplement (doi:10.3390/medicina57101045), 2021-09-30
Supplement: s1 [file s1]

## THE STUDENTS' KNOWLEDGE ABOUT THE PREVENTION OF CERVICAL CANCER

1. What is the main factor risk of cervical cancer?
  - a) Smoking cigarettes
  - b) Early initiation of sexual intercourse/many sexual partners
  - c) Human papillomaviruses (HPV)
  - d) Chlamydiosis
2. Is cervical cancer genetically inherited?
  - a) Yes
  - b) No
3. What is the characteristic symptom of early stage cervical cancer?
  - a) Bleeding beyond menstruation
  - b) Abundant vaginal discharge
  - c) Pain during sexual intercourse
  - d) There are no characteristic symptoms of early stage cervical cancer
4. What is the name of the screening test for cervical cancer?
  - a) Cystoscopy
  - b) Pap test
  - c) Colposcopy
  - d) Vaginal ultrasound
5. What is the screening test for cervical cancer?
  - a) Examination of the cervix using an optical equipment
  - b) Gynecological examination of the cervix
  - c) Microscopic evaluation of the exfoliated cells from the vaginal part of the cervix
  - d) Biopsy of the cervix
6. When should the first prophylactic test for cervical cancer be performed?
  - a) Shortly after sexual initiation
  - b) Before a planned pregnancy
  - c) During the first pregnancy
  - d) After the birth of the first child
7. To women, at what age is the Population Program for the Prevention and Early Detection of Cervical Cancer in Poland directed?
  - a) Women from 18 years old every year
  - b) Women 25-59 years old every year
  - c) Women 25-59 years old every 3 years
  - d) Women 35-69 years old every 3 years
8. What is the most important for reducing the own risk of cervical cancer?
  - a) Use of a condom
  - b) Not using hormonal contraception
  - c) Eating healthy and being physically active
  - d) Vaccination against HPV viruses

Gender:

- ☐ Woman
- ☐ Man

Age: ..... years

Faculty:

- ☐ Medicine
- ☐ Health Sciences
- ☐ Veterinary Medicine
- ☐ Technical Sciences
- ☐ Law/Administration
- ☐ Art
- ☐ Humanistic
- ☐ Social Sciences
- ☐ Theology
- ☐ Other

Degree of study:

- ☐ Bachelor's degree
- ☐ Master degree

Are you sexually active?

- ☐ Yes
- ☐ No

Have you ever had a conversation with someone about cervical cancer?

- ☐ Yes                      with who?.....
- ☐ No
